# Supplementary material for: Hormonal manipulation in androgen signaling: a narrative review on using novel androgen therapy agents to optimize clinical outcomes and minimize side effects for prostate cancer patients
Source: PubMed Central journal article supplement — Transl Androl Urol. 2021 Jul;10(7):3199–207. doi: 10.21037/tau-20-1053 (PMC8350226; doi:10.21037/tau-20-1053), 2021-07
Supplement: tau-10-07-3199-rc.pdf [file tau-10-07-3199-rc.pdf]

## Narrative Review Checklist

| Section/Topic             | Item No | Item                                                                                                                                                                                                                                                                                 | Reported on Page Number/Line Number | Reported on Section/Paragraph |
|---------------------------|---------|--------------------------------------------------------------------------------------------------------------------------------------------------------------------------------------------------------------------------------------------------------------------------------------|-------------------------------------|-------------------------------|
| <b>TITLE</b>              |         |                                                                                                                                                                                                                                                                                      |                                     |                               |
| Title                     | 1       | Identify the report as a Narrative Review of ...                                                                                                                                                                                                                                     |                                     |                               |
| <b>ABSTRACT</b>           |         |                                                                                                                                                                                                                                                                                      |                                     |                               |
| Unstructured summary      | 2       | Provide an unstructured summary including, as applicable: background, objective, brief summary of narrative review and implications for future research, and clinical practice or policy development.                                                                                |                                     |                               |
| <b>INTRODUCTION</b>       |         |                                                                                                                                                                                                                                                                                      |                                     |                               |
| Rationale/background      | 3       | Describe the rationale for the review in the context of what is already known.                                                                                                                                                                                                       |                                     |                               |
| Objectives                | 4       | Specify the key question(s) identified for the review topic.                                                                                                                                                                                                                         |                                     |                               |
| <b>METHODS</b>            |         |                                                                                                                                                                                                                                                                                      |                                     |                               |
| Research selection        | 5       | Specify the process for identifying the literature search (eg, years considered, language, publication status, study design, and databases of coverage).                                                                                                                             |                                     |                               |
| <b>DISCUSSION/SUMMARY</b> |         |                                                                                                                                                                                                                                                                                      |                                     |                               |
| Narrative                 | 6       | Discuss: 1) research reviewed including fundamental or key findings, 2) limitations and/or quality of research reviewed, and 3) need for future research.                                                                                                                            |                                     |                               |
| Summary                   | 7       | Provide an overall interpretation of the narrative review in the context of clinical practice and/or the Nutrition Care Process for registered dietitian nutritionists, clinical practice for other health professionals, policy development and implementation, or future research. |                                     |                               |
